# Supplementary material for: Phospholipase Cε, an Effector of Ras and Rap Small GTPases, Is Required for Airway Inflammatory Response in a Mouse Model of Bronchial Asthma
Source: PubMed Central journal article supplement (PMC4182471; doi:10.1371/journal.pone.0108373), 2014-09-30

# Figure S1

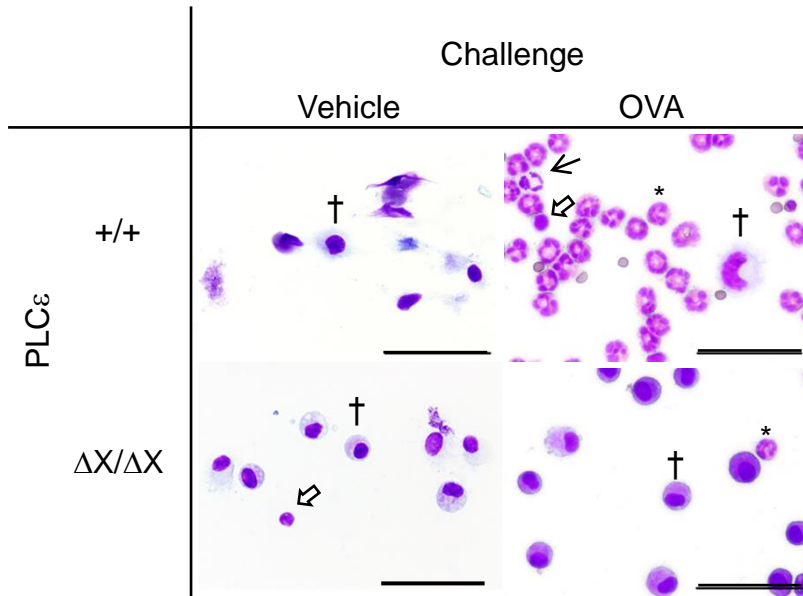

# Figure S2

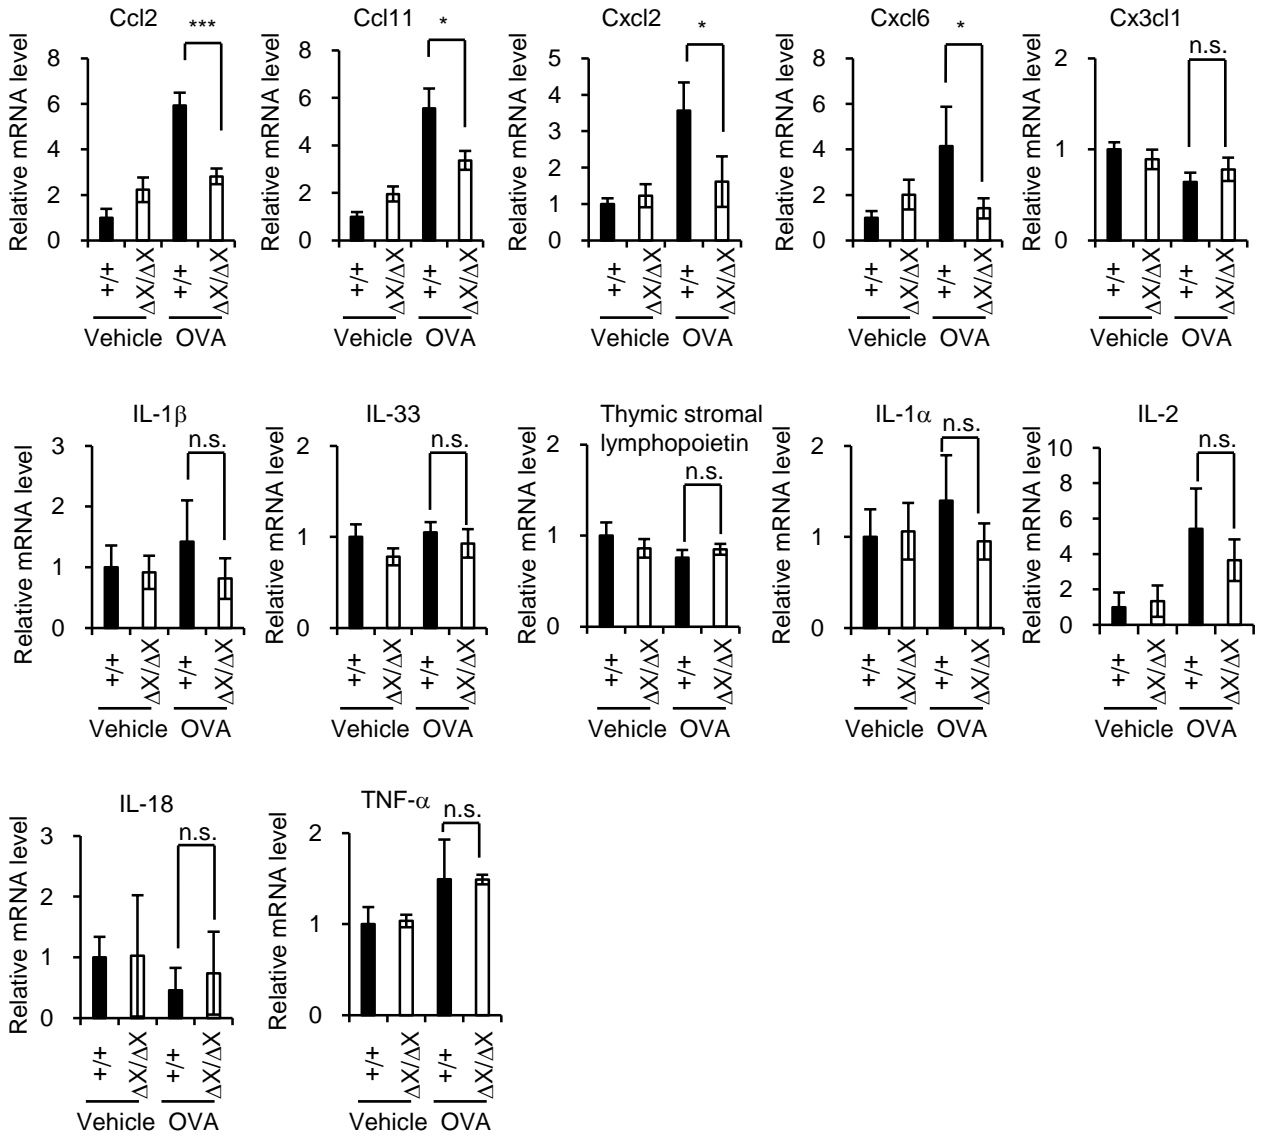

# Figure S3

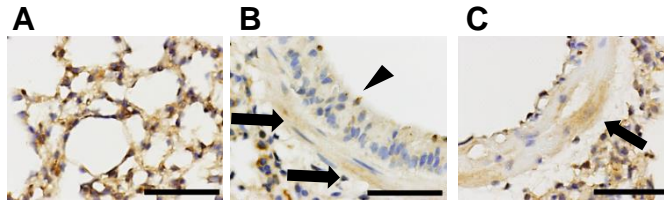

Supplement: pone.0108373.s001.pdf [file pone.0108373.s001.pdf]
